# Supplementary material for: A bead-based western for high-throughput cellular signal transduction analyses
Source: PubMed Central journal article supplement (PMC5036152; doi:10.1038/ncomms12852), 2016-09-23
Supplement: ncomms12852-s1.pdf [file ncomms12852-s1.pdf]

**Supplementary figure 1: Comparison of DigiWest and Western blot.**

20 µg of HepG2 lysate were processed using the described DigiWest procedure and aliquots of the generated bead pools were incubated with 104 commercially available antibodies; for comparison the same set of antibodies was used in standard Western blotting. Classical Western blot (left), DigiWest data, illustrated as a graph (middle) and grayscale maps (generated from numerical DigiWest data) are shown side by side for all tested antibodies. The antibodies in this set were selected to cover characteristics relevant for Western blotting: (i) single band antibodies and antibodies recognising multiple bands (ii) antibodies that result in high and in low signal, (iii) antibodies that detect proteins over the entire molecular weight range of the employed gel system, (iv) monoclonal and polyclonal antibodies and (v) antibodies recognizing soluble and membrane bound proteins. All Western blots we show in supplementary figure 1 were performed on one batch of HepG2 cells. N.B.: While Western blotting conditions and image acquisition for all these antibodies occurred under identical conditions, the employed protocol varies slightly from the described DigiWest workflow. Differences in buffer composition and a different blotting membrane (see methods section) contribute to the small differences seen in this comparison.

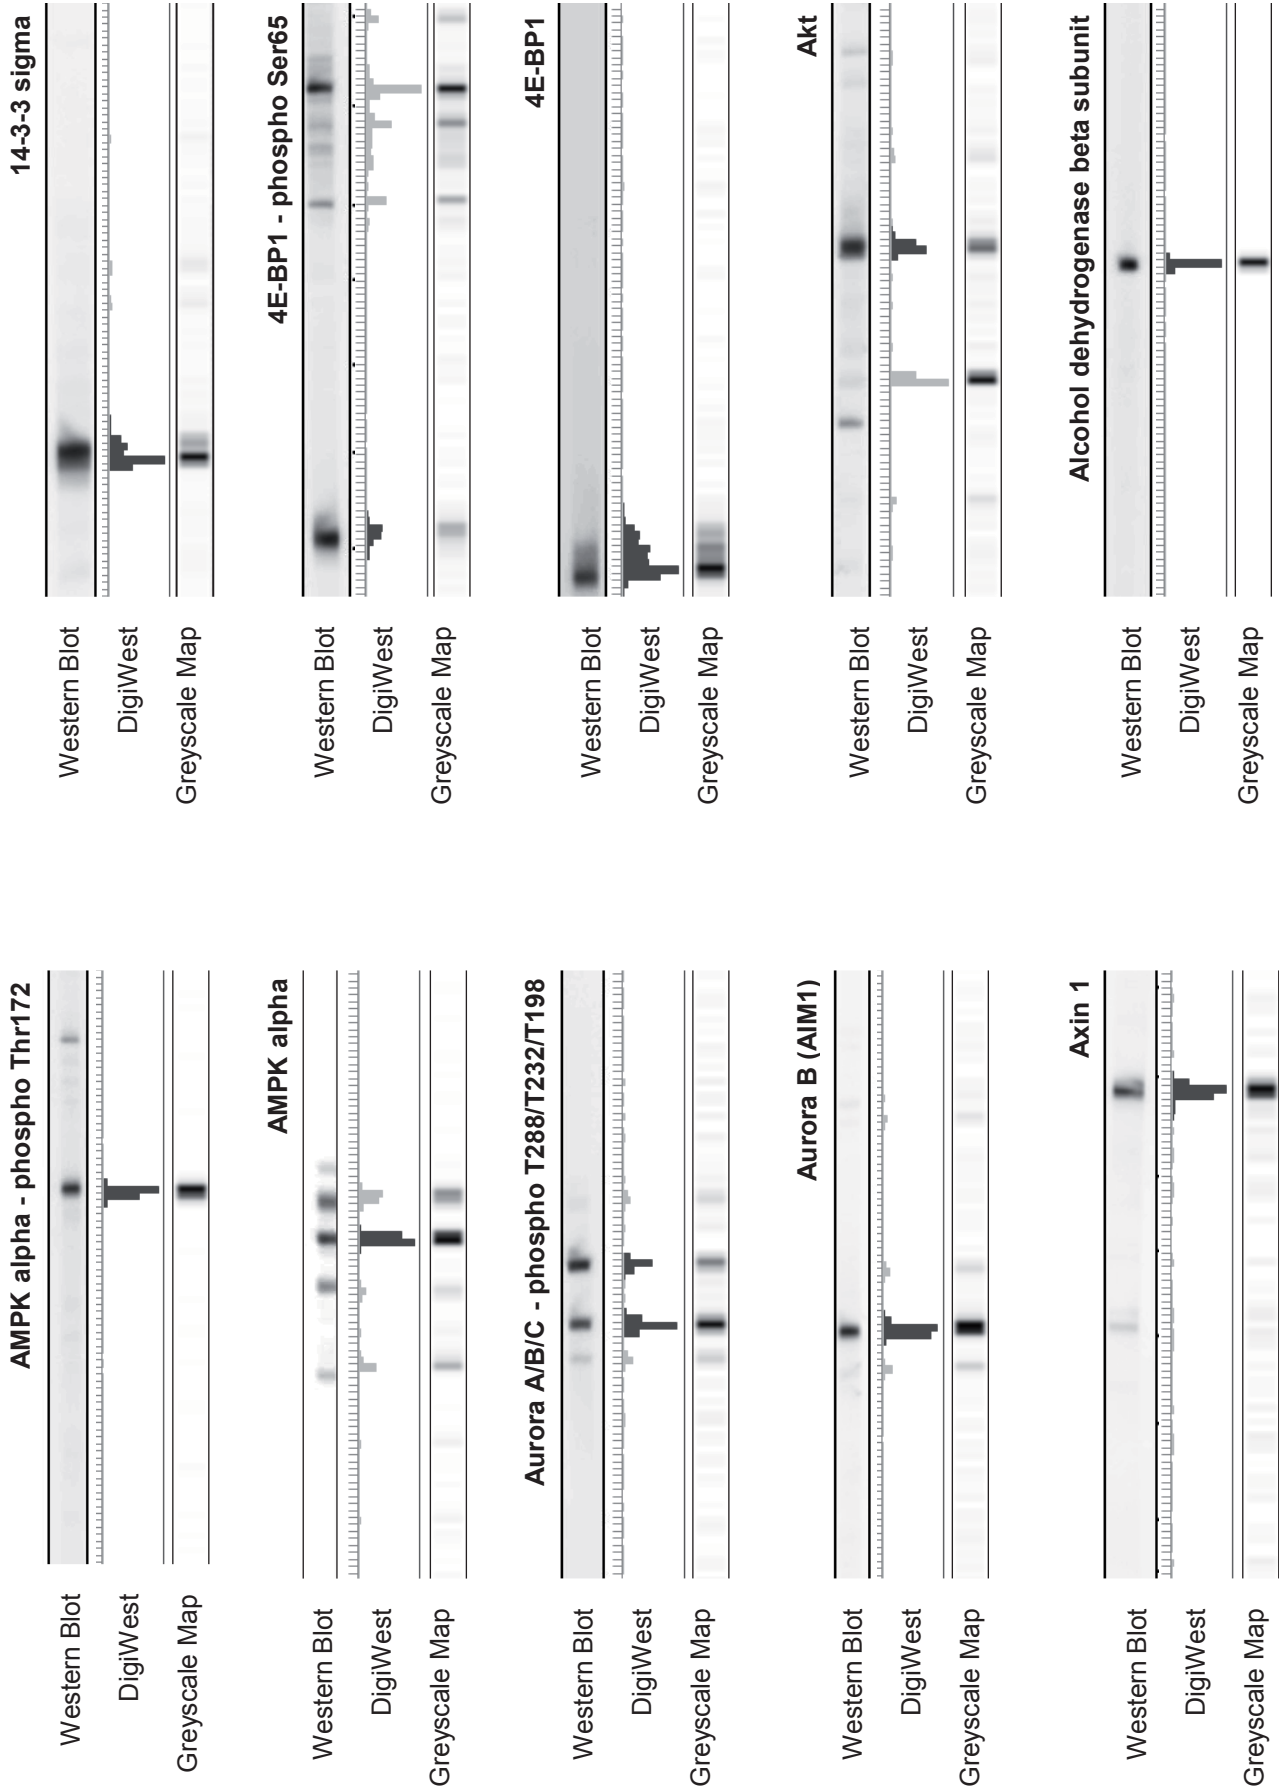

**Bmf**

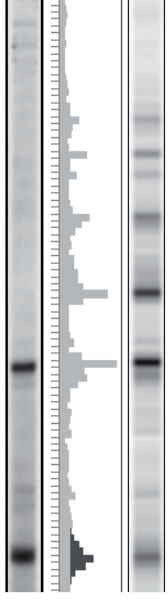

Western Blot  
DigiWest  
Greyscale Map

**Calnexin**

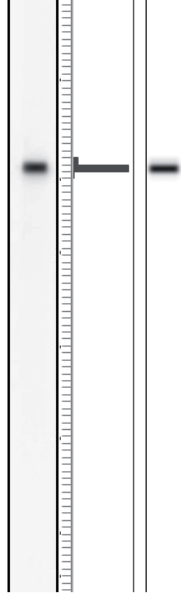

Western Blot  
DigiWest  
Greyscale Map

**Caseinkinase 1 delta**

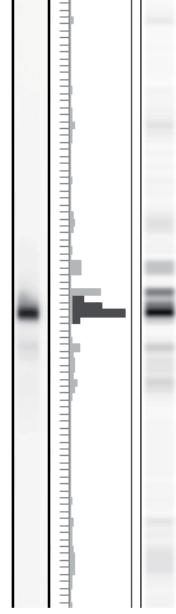

Western Blot  
DigiWest  
Greyscale Map

**Caspase 3**

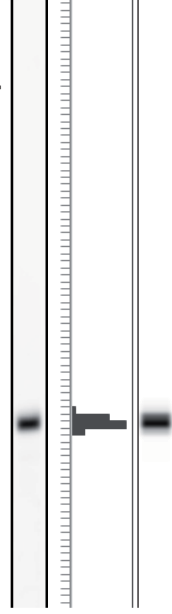

Western Blot  
DigiWest  
Greyscale Map

**Caspase 9**

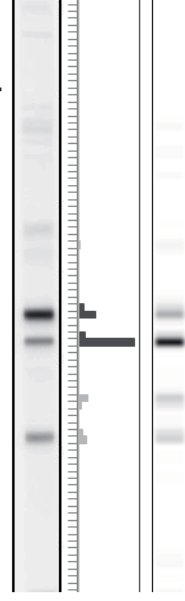

Western Blot  
DigiWest  
Greyscale Map

**Bcl2**

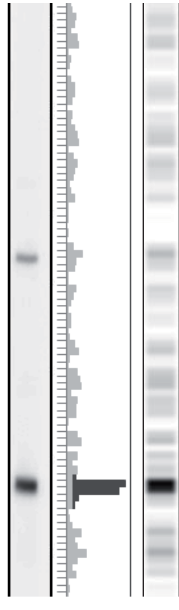

Western Blot  
DigiWest  
Greyscale Map

**Bcl-xL**

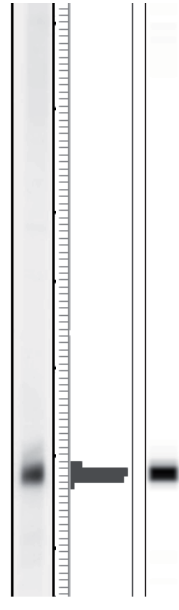

Western Blot  
DigiWest  
Greyscale Map

**beta-Actin**

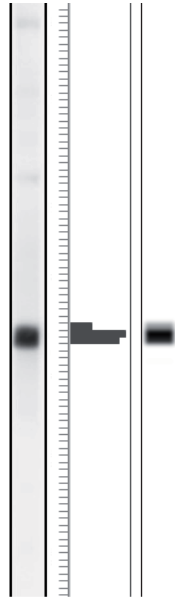

Western Blot  
DigiWest  
Greyscale Map

**beta-Catenin - phospho Ser675**

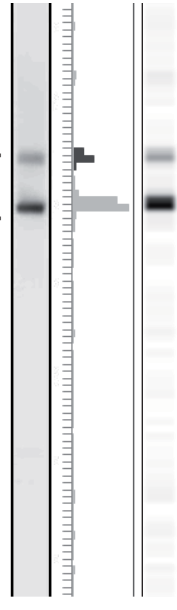

Western Blot  
DigiWest  
Greyscale Map

**beta-Catenin**

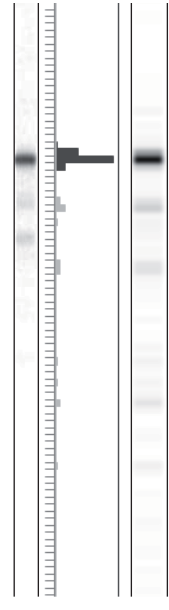

Western Blot  
DigiWest  
Greyscale Map

**Cofilin - phospho Ser3**

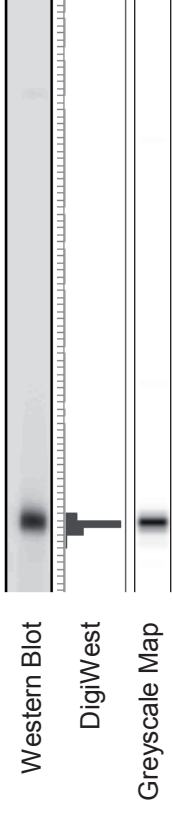

**Cofilin**

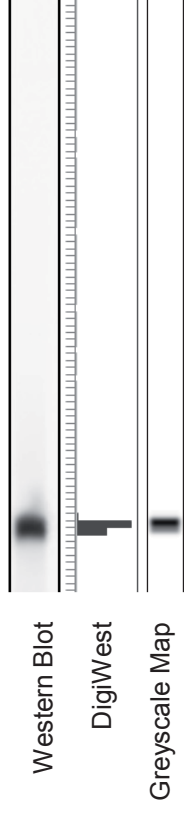

**c-Raf - phospho Ser259**

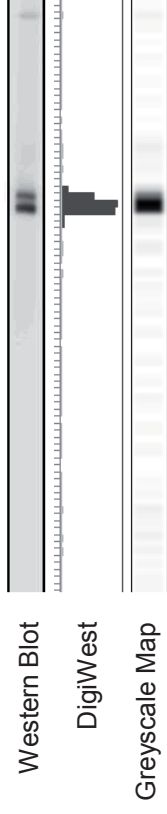

**c-Raf**

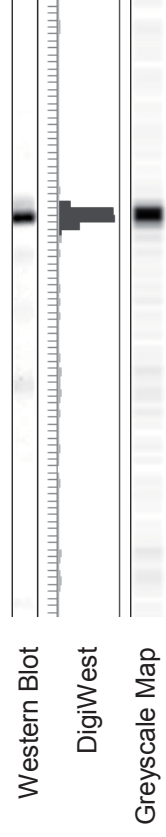

**CREB - phospho Ser133**

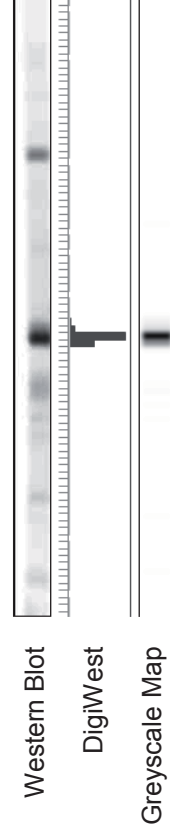

**cdc2 - phospho Tyr15**

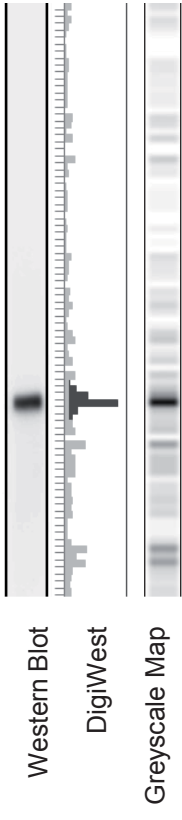

**cdc2 (CDK1)**

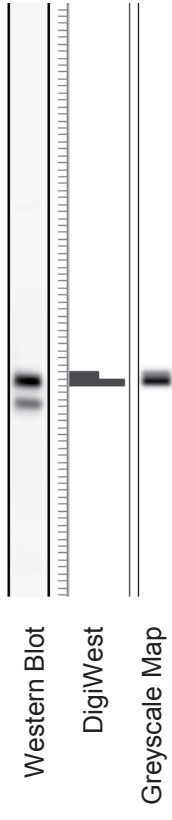

**CDKN2B (p15 INK4B)**

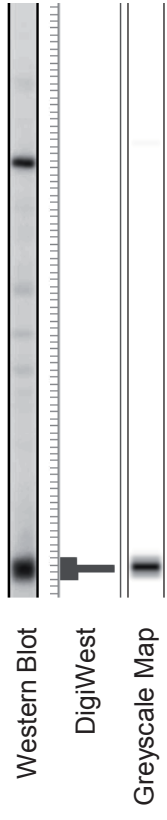

**c-myc - phospho Thr58/Ser62**

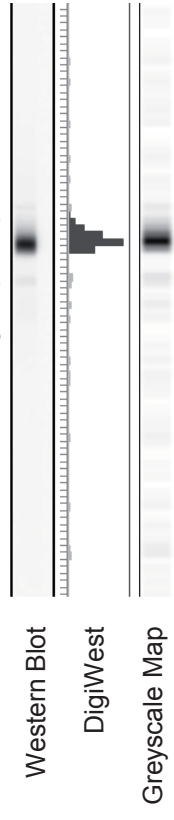

**c-myc**

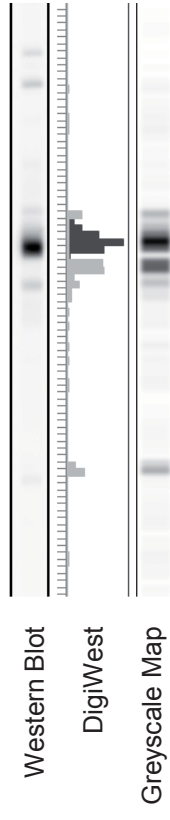

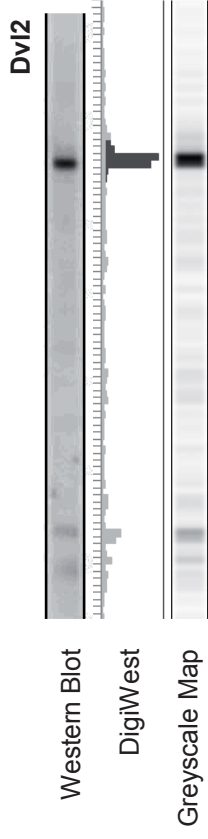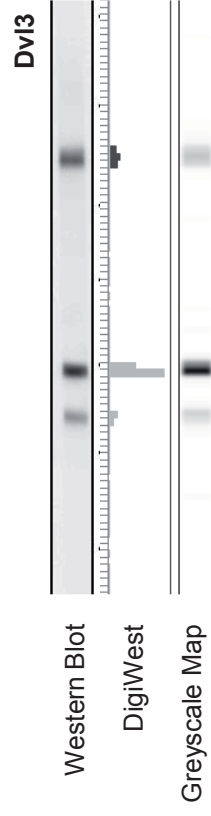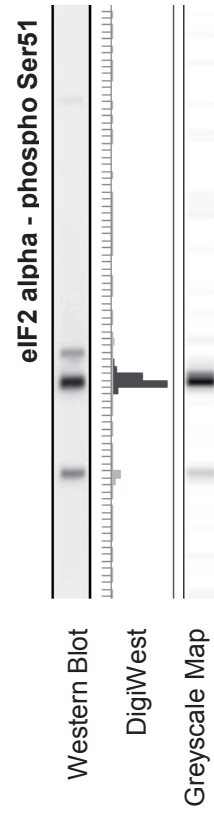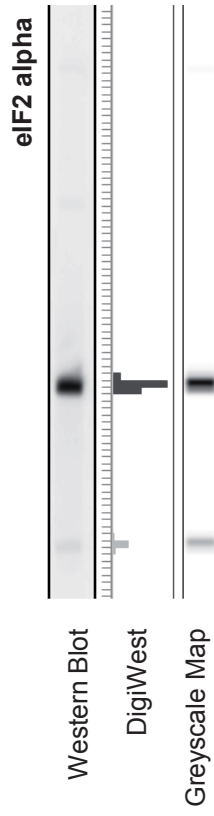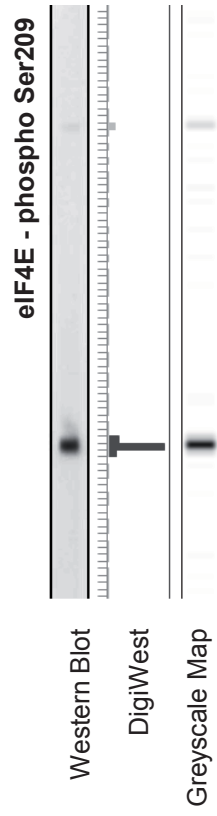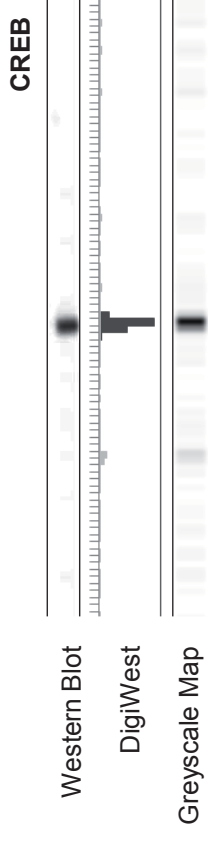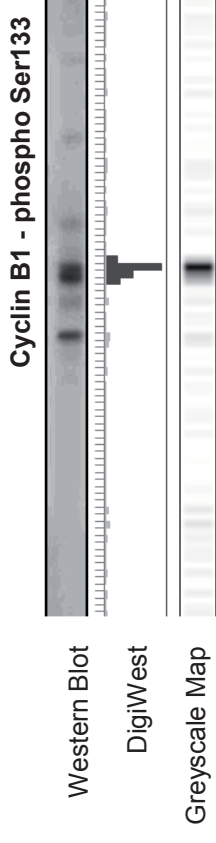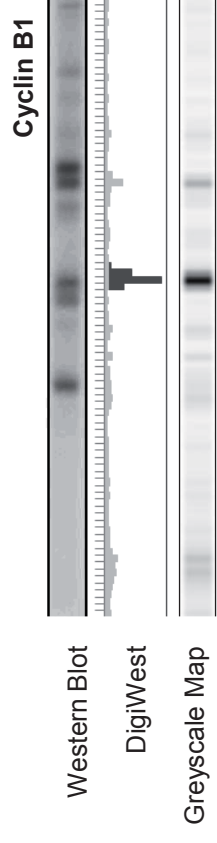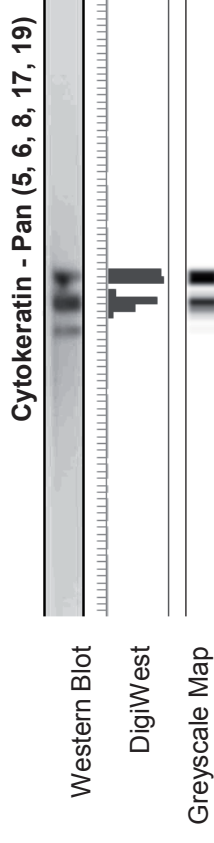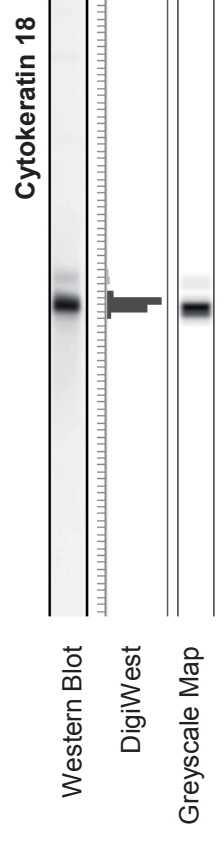

**GSK3 beta - phospho Ser9**

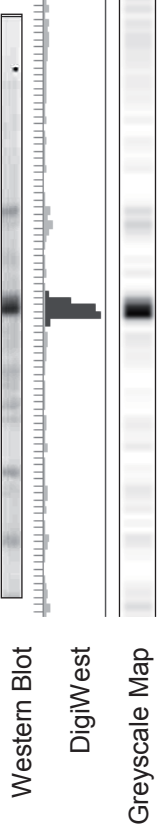

**eIF4E**

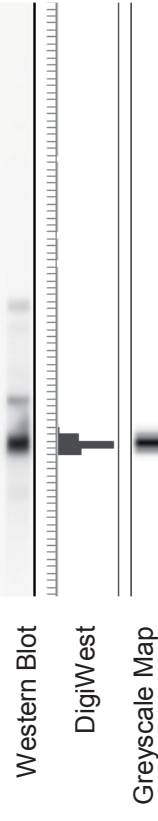

**GSK3 beta**

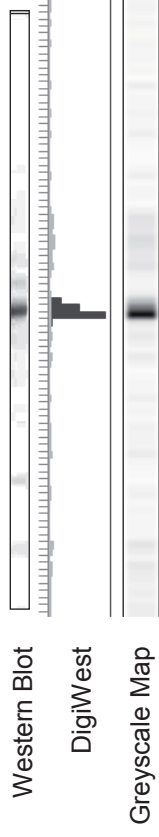

**ERK1/2 phospho Thr202/Tyr204**

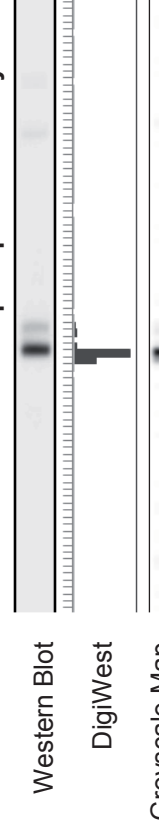

**Ha-ras**

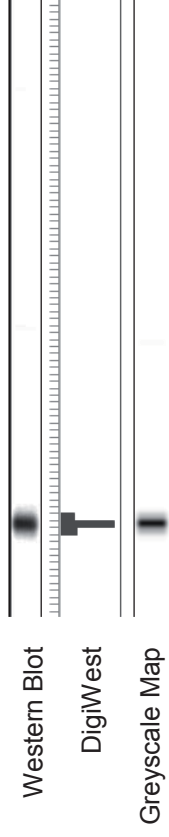

**GAPDH**

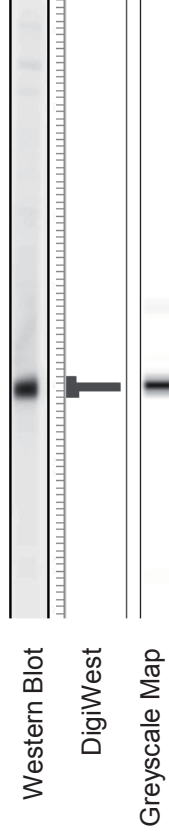

**Her2**

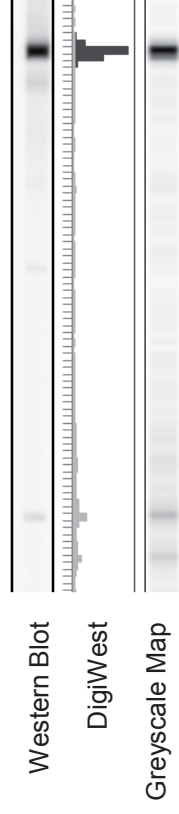

**GCN5L2**

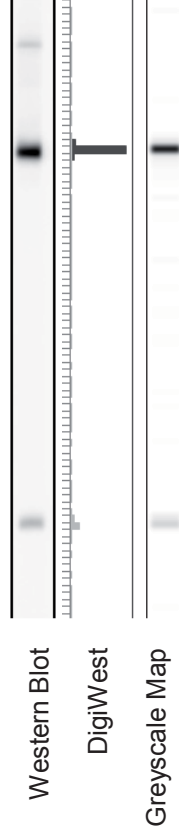

**HIF1 alpha**

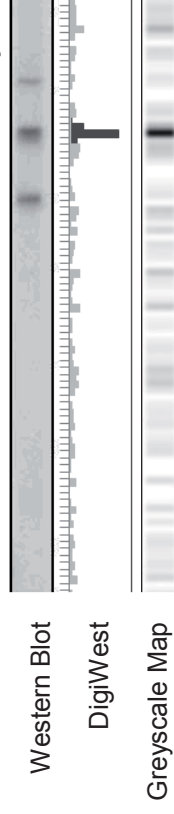

**GDF3**

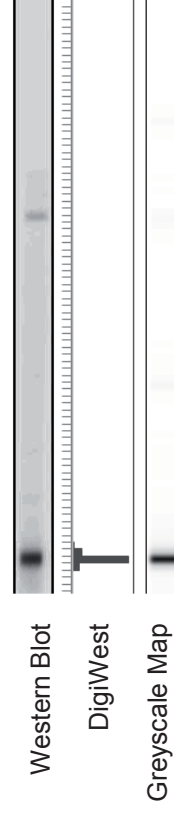

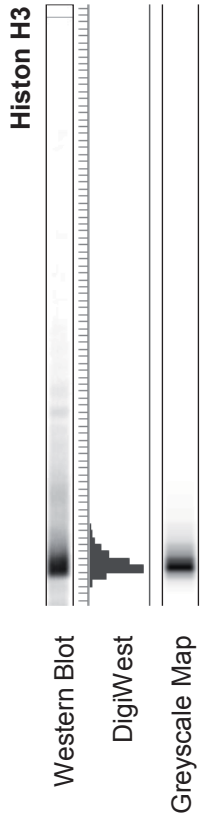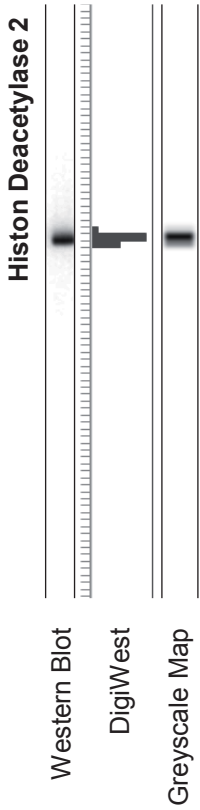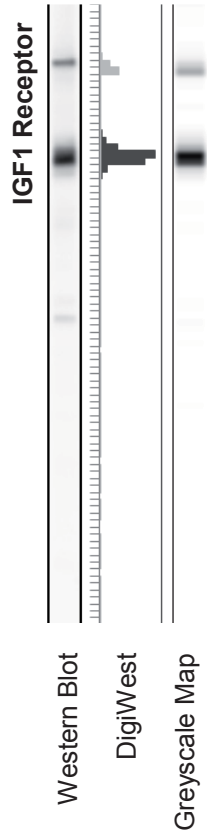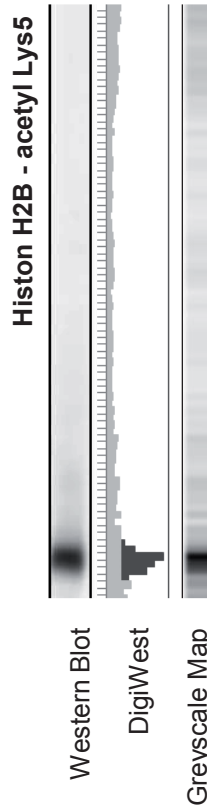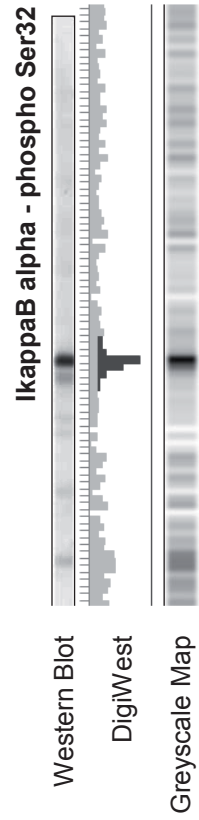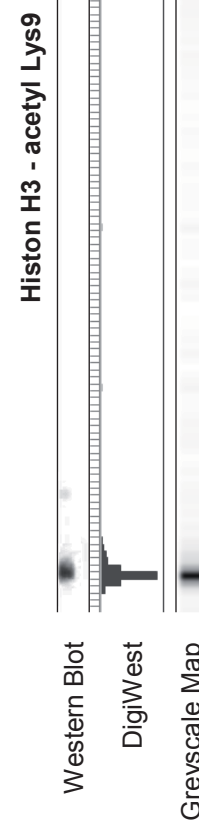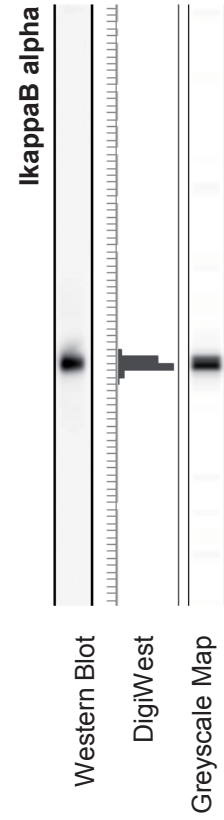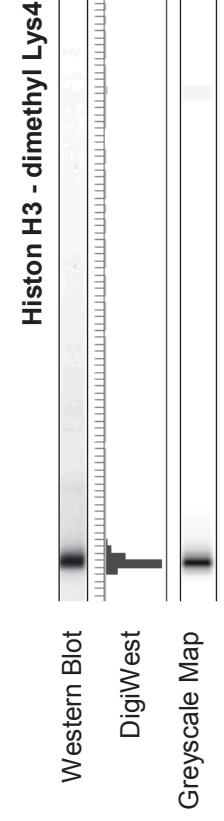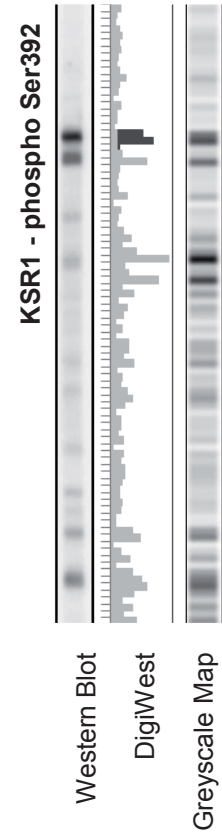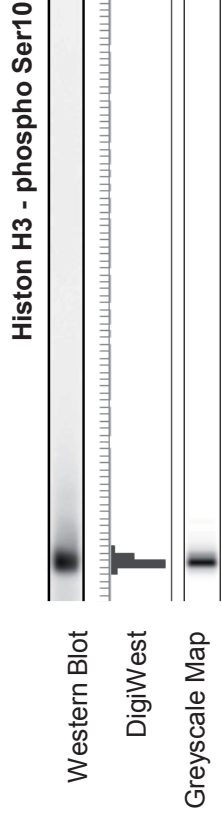

**MEK2**

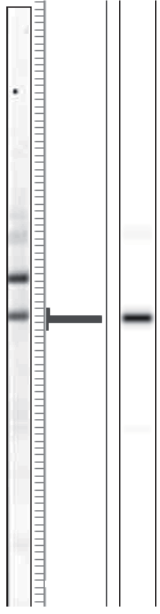

Western Blot

DigiWest

Greyscale Map

**KSR1**

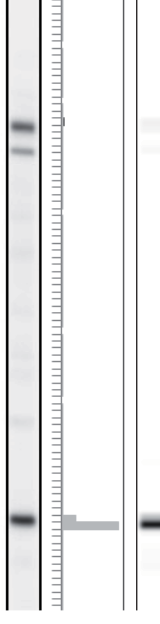

Western Blot

DigiWest

Greyscale Map

**MKK4 - phospho Ser257/Thr261**

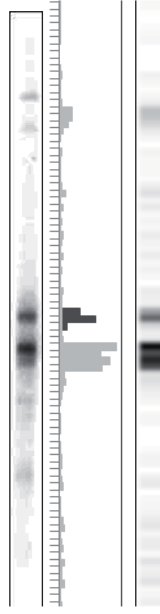

Western Blot

DigiWest

Greyscale Map

**LRP6**

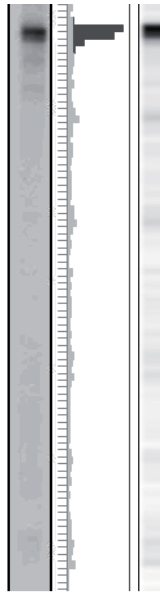

Western Blot

DigiWest

Greyscale Map

**MKK4**

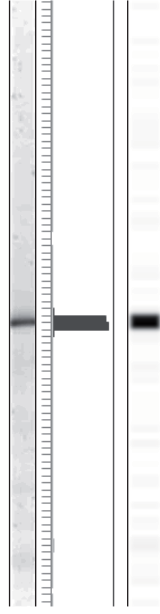

Western Blot

DigiWest

Greyscale Map

**Mcl-1 - phospho Ser159/Thr163**

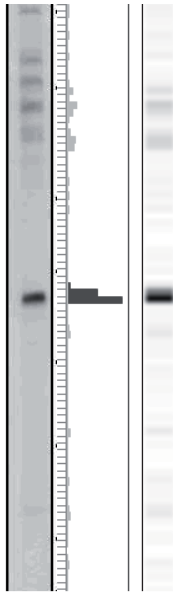

Western Blot

DigiWest

Greyscale Map

**MLK3 ( MAP3K11)**

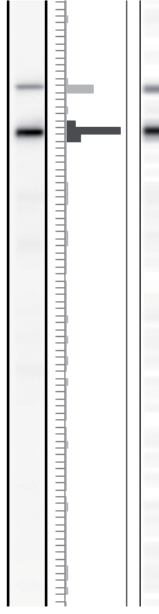

Western Blot

DigiWest

Greyscale Map

**Mcl-1**

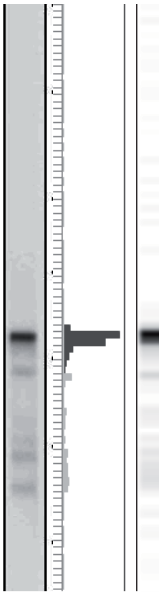

Western Blot

DigiWest

Greyscale Map

**MOB1**

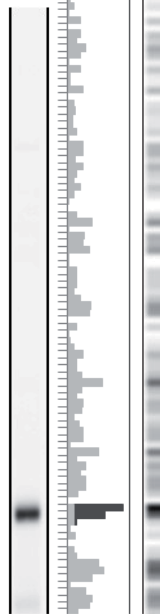

Western Blot

DigiWest

Greyscale Map

**MEK1/2 - phospho Ser217/221**

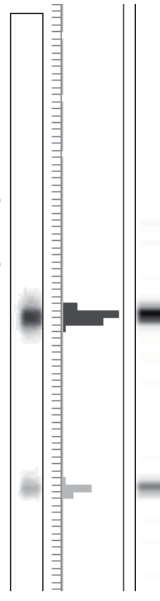

Western Blot

DigiWest

Greyscale Map



**PAK 2**

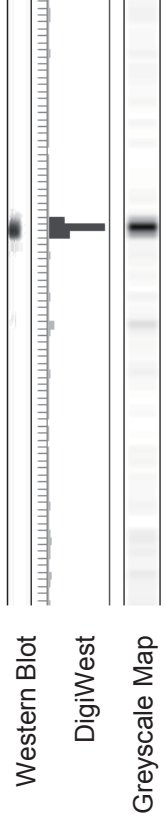

**MSK1 - phospho Ser376**

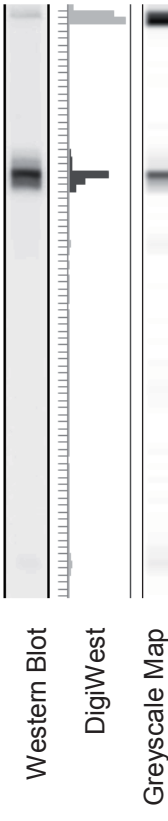

**PAK1/2/3 - phospho Ser141**

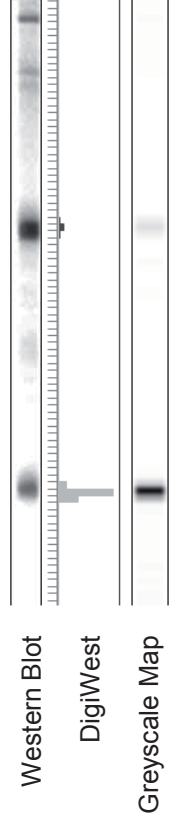

**mTOR - phospho Ser2448**

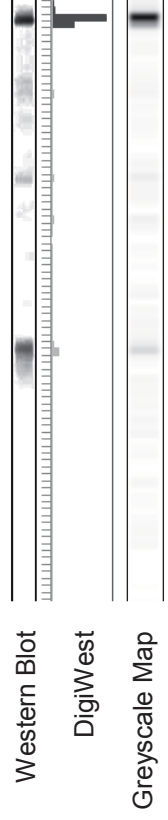

**PERK**

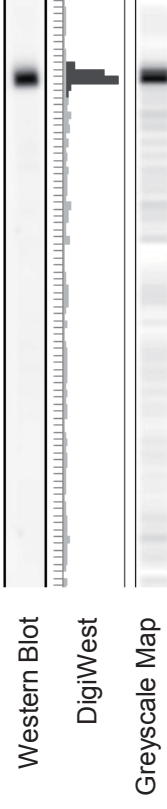

**mTOR**

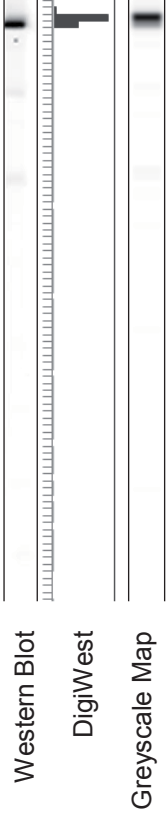

**PI3-kinase p110 beta**

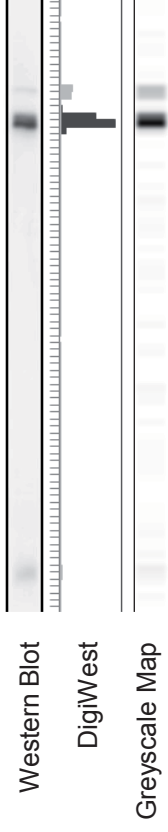

**NF-κB p65 - phospho Ser536**

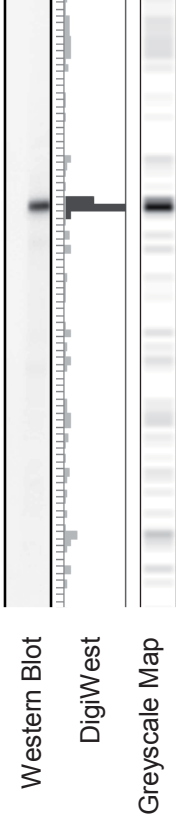

**PKA C alpha**

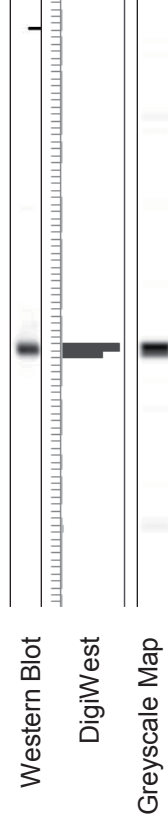

**NF-κB p65**

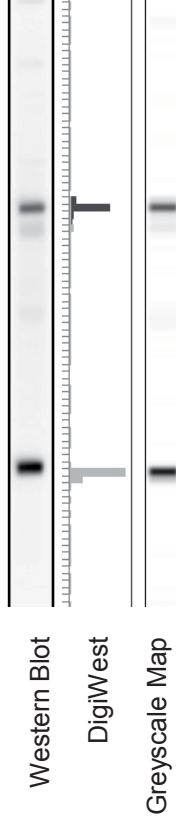

**PP1 alpha - phospho Thr320**

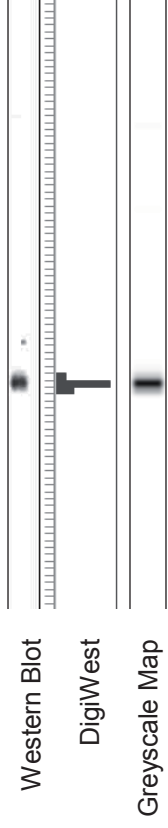

**PP1 alpha**

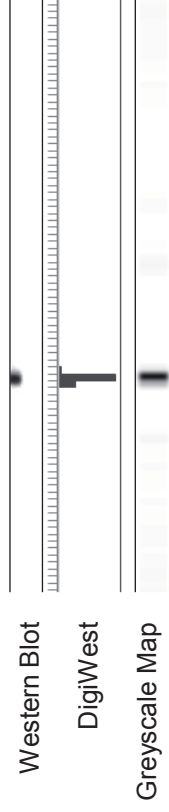

**PRL-1 (PTP4A1)**

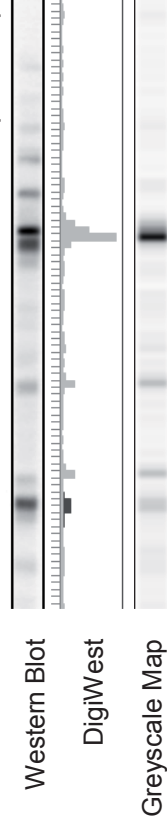

**PTP-PEST (PTPN12, PTPN12)**

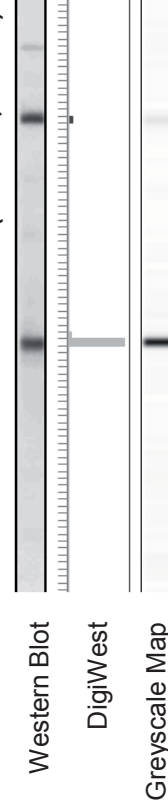

**PTPRR (PTP-SL, PTP13)**

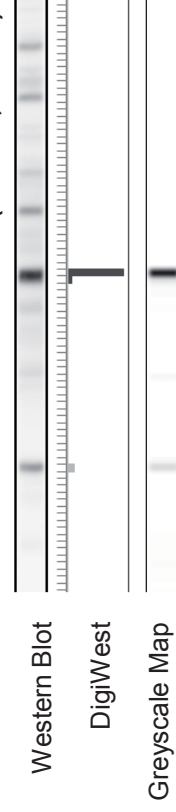

**PKA C alpha/beta - phospho Thr197**

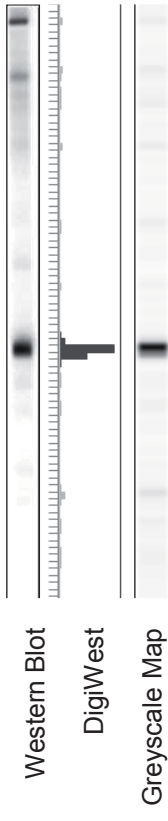

**PKR**

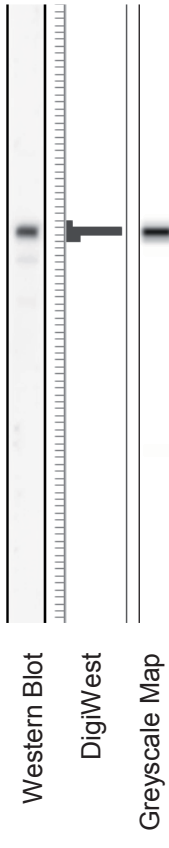

**PKR - phospho Thr446**

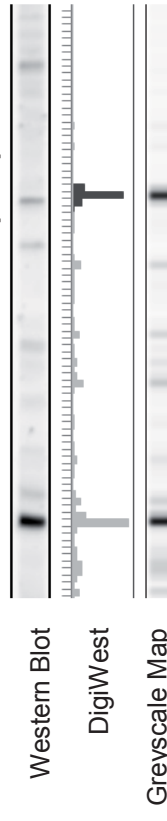

**PLC gamma I - phospho Tyr783**

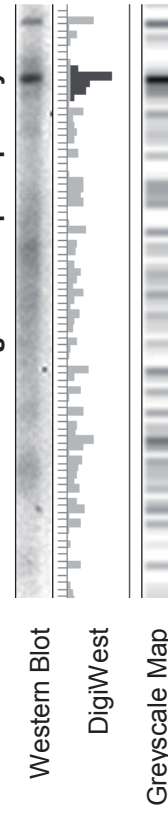

**PLC gamma I**

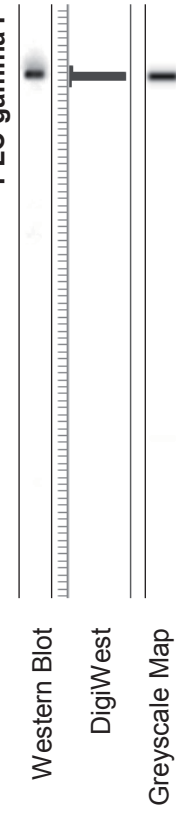

**Smad2/3**

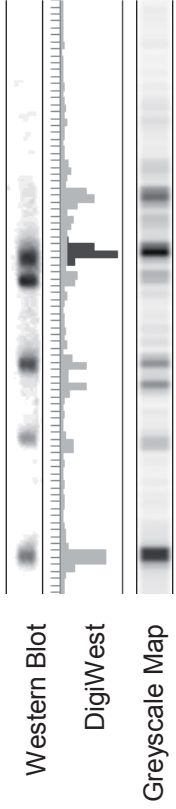

**SOCS3**

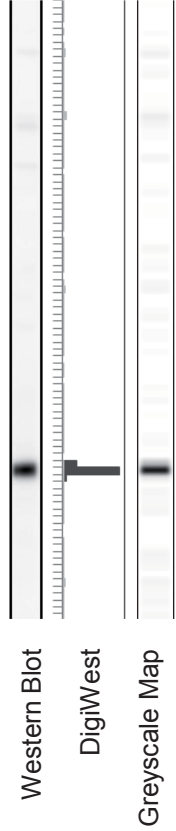

**SPRY2 (Protein sprouty homolog 2)**

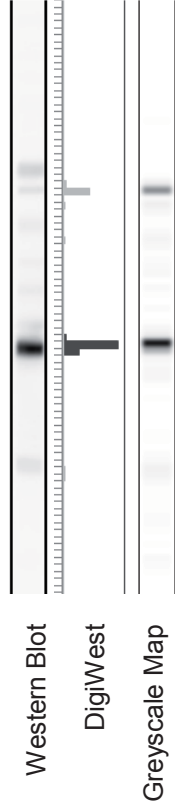

**SPRY3 (Spry-3, Sprouty 3)**

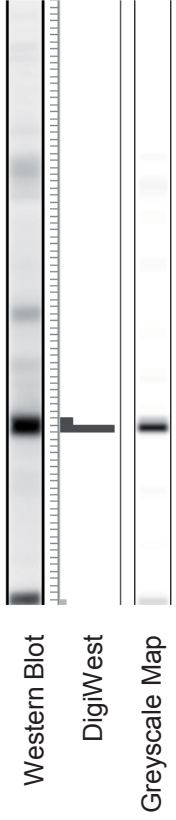

**STAT 3 - phospho Tyr705**

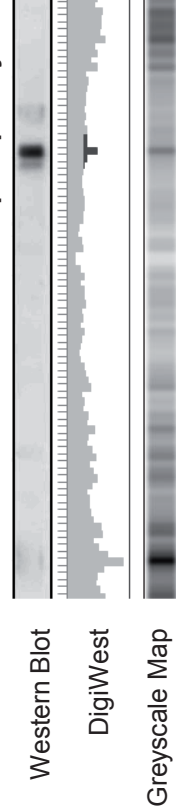

**Rad51**

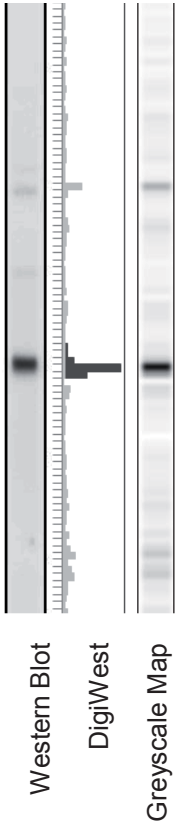

**RKIP (PBP, PEBP, PEBP1)**

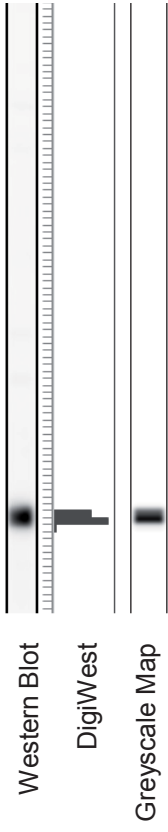

**RSK 4 - phospho Ser235**

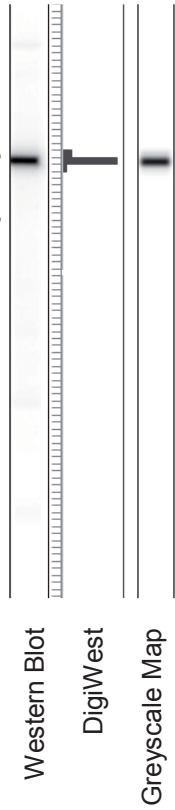

**Smad1**

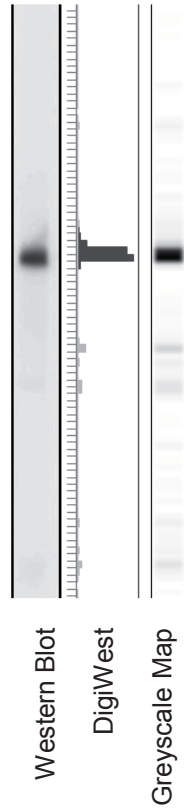

**Smad2 - phospho Ser245/250/255**

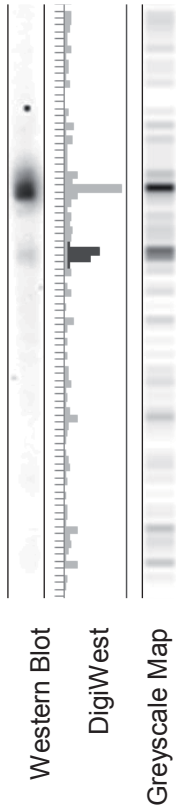

**STAT 3**

Western Blot

DigiWest

Greyscale Map

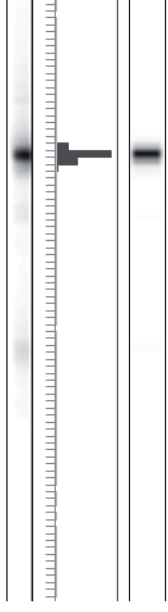

**Superoxide dismutase (Cu/Zn)**

Western Blot

DigiWest

Greyscale Map

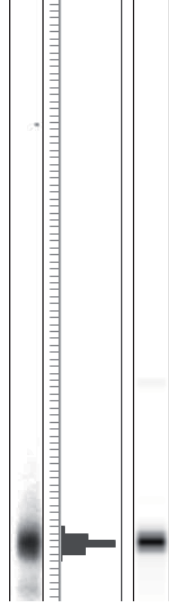

**TAK1**

Western Blot

DigiWest

Greyscale Map

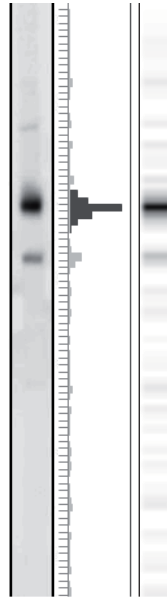

**Topoisomerase 1**

Western Blot

DigiWest

Greyscale Map

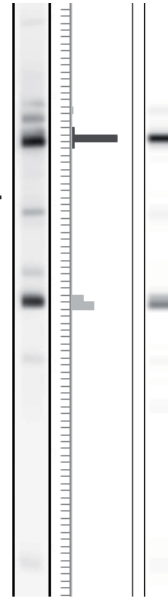

## Supplementary figure 2: Effect of protein biotinylation on antibody binding during Western-blotting.

Western-blotting was performed under standard conditions and 20 µg HepG2 lysate were loaded per lane. Half of the Western-blot was processed under standard conditions, whereas the other half was subjected to the biotinylation step as performed in the DigiWest workflow. The Western-blotting was cut into blocks each containing 2 lanes and an antibody incubation was performed each using one block of a blot with and without biotinylation. Antibodies detecting proteins of different molecular weight and antibodies detecting phosphorylated proteins were used. To verify protein biotinylation, one block with and without biotinylation was incubated with IRDye800 labelled streptavidin. No differences in signal intensities for the 12 tested antibodies were detected, indicating that the biotinylation step that is performed during the DigiWest procedure does not influence antigenicity of the separated proteins and antibody recognition is not influenced.

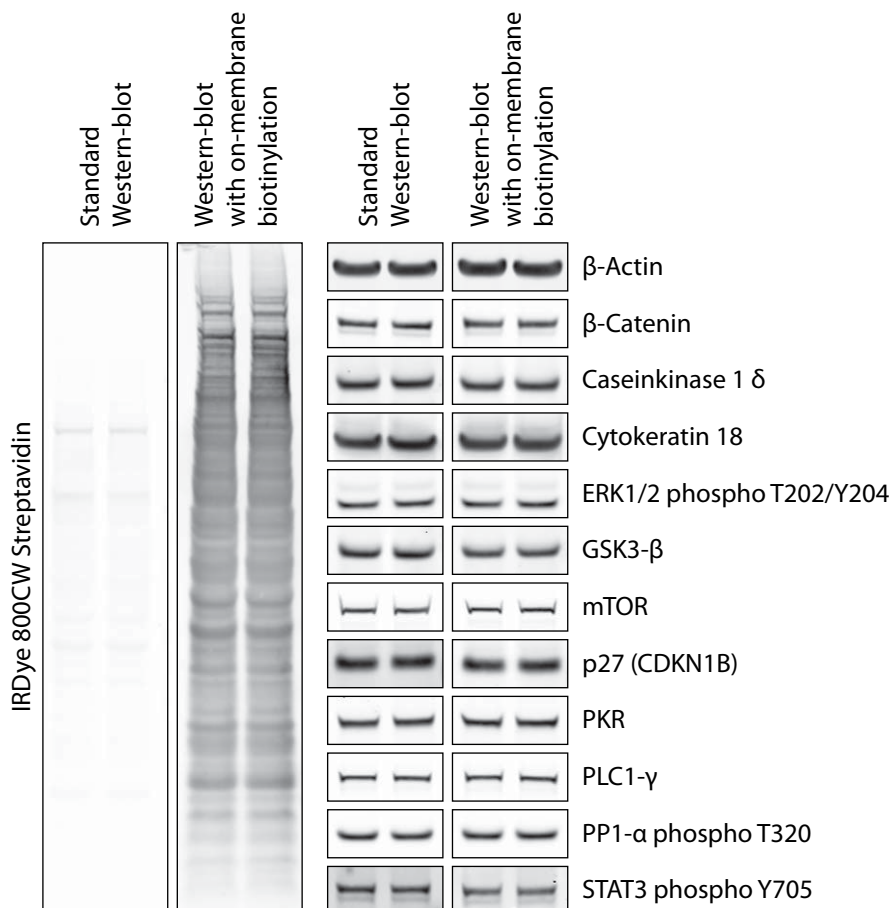

### Supplementary figure 3: Comparison of DigiWest and Western blot – Correlation analysis.

Correlation analysis between DigiWest peak intensities and Western blot band intensities was performed on expression data generated by the described DigiWest procedure and by a standardised Western blot protocol. Western blot band intensities were quantified using a near infrared fluorescence scanner as read-out system (see methods section). Proteins from mouse liver lysate (10 µg) were separated for DigiWest and for standard Western blotting, 30 antibodies (see supplementary figure 1) were used and the obtained numerical data were analysed. 2 antibodies gave no band in Western blotting whereas for 1 antibody no signal in DigiWest and Western blot was obtained. The signals generated for the remaining 27 antibodies were used for a correlation analysis and a Pearson correlation coefficient  $r$  of 0.86 was determined.

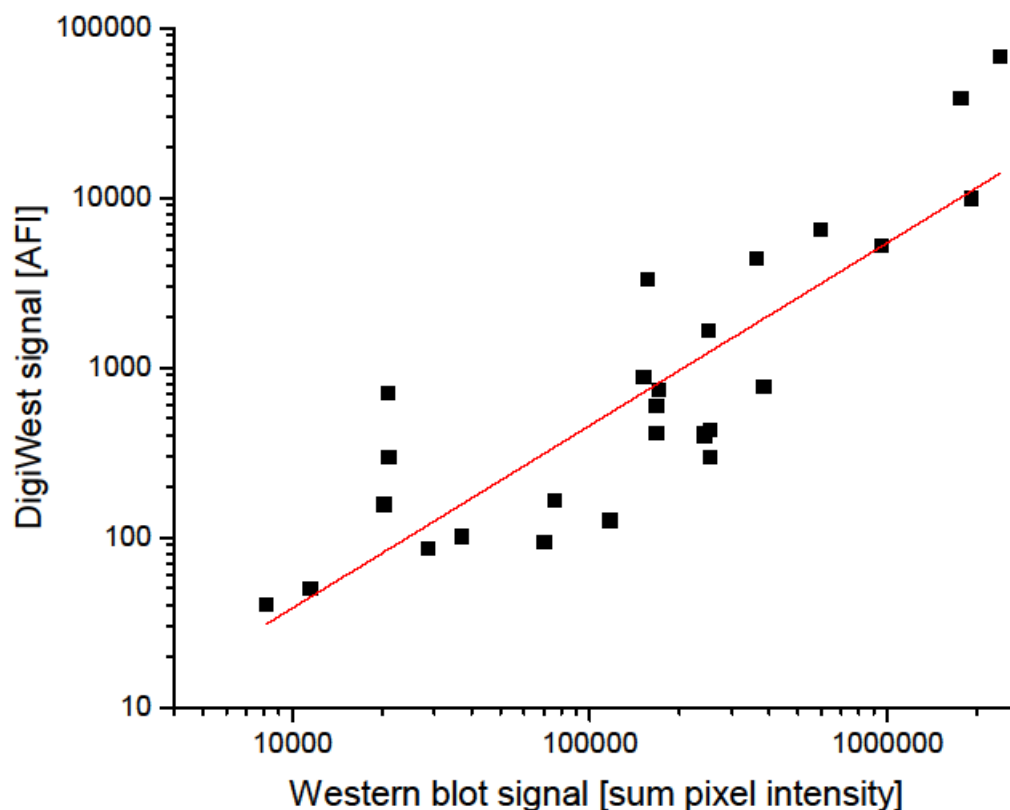

#### Supplementary figure 4: Binding capacity of Neutravidin coated beads.

To investigate the biotin binding capacity of the Neutravidin coated Luminex beads a DigiWest experiment was performed with a 1:2 dilution series of HepG2 lysate. 48 molecular weight fractions were generated from each Western blot lane covering the molecular weight range from 30 to 110 kDa containing most of the highly abundant proteins. After protein loading the DigiWest beads were incubated with a biotinylated peptide (c-Myc, Biotin-Doa-Doa-EQKLISEEDL) to occupy the remaining free biotin binding sites. The resulting bead mixes were either incubated with PE-labelled streptavidin or with an antibody detecting the peptide (c-Myc clone 9E10) and a PE-labelled secondary antibody. The signal obtained with PE-labelled streptavidin was used as a measure for bead-bound biotinylated proteins whereas the signal obtained with the c-Myc antibody was used as a measure for free biotin binding sites.

**a)** Signal obtained with PE-labelled streptavidin (red) normalized to the highest value and signal obtained with the c-Myc antibody (blue) normalized to the highest value (negative values). When 40  $\mu$ g HepG2 lysate are loaded saturation occurs based on the biotin-binding capacity.

**b)** Integrated signals normalized to the highest value.

Under the established DigiWest condition (amount of loaded protein 2.5 to 20  $\mu$ g) the binding capacity of the Neutravidin coated Luminex beads is in excess of biotinylated protein and thereby quantitative measurements are possible.

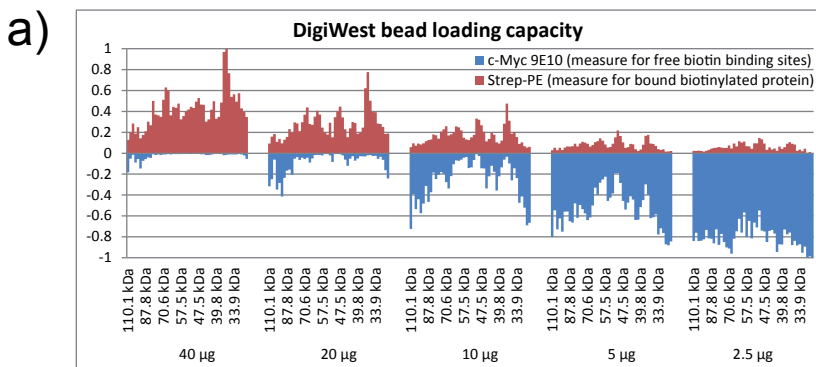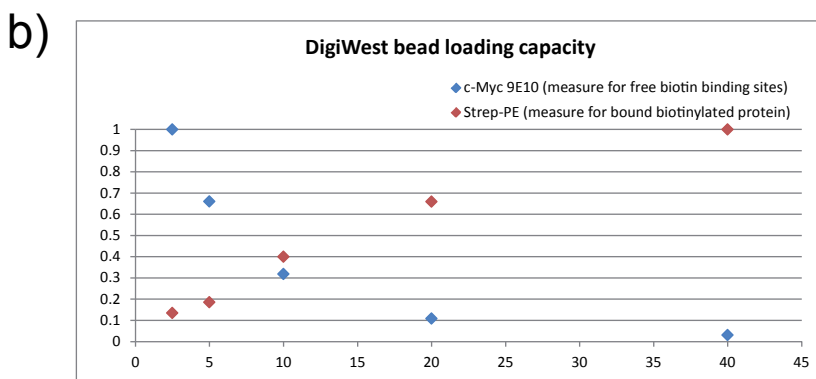

**Supplementary figure 5: Protein binding capacity: Effect of increasing amounts of competing protein on signal intensity.**

Beads obtained from the spike-in experiment (supplementary figure 2) were probed with an antibody recognizing PKR, a protein running exactly at the same molecular weight as GST-ERK2 (69 kDa) and signal was generated using standard conditions. Also shown is the signal generated with the ERK1/2 specific antibody for the samples spiked with GST-ERK2 (replicate 1 in supplementary figure 2).

**a)** Representation of obtained signal for the antibody directed against ERK1/2 as bar diagram; intrinsic ERK1 is highlighted in black, intrinsic ERK2 is highlighted in dark gray, spiked GST-ERK2 in medium gray (data also shown in supplementary figure 2) and data obtained with the antibody directed against PKR is shown in black.

**b)** Western-blot mimics (gray-scale maps generated from the Luminex data) representing the same data as in a).

The standard deviation of all integrals of the obtained PKR signals showed a CV of 8.8%; no competing effect was observed by increasing the amount of spiked protein. This experiment implies that quantitative measurements are possible since even a high amount of competing protein does not influence signal intensity of the protein of interest.



Supplementary figure 5

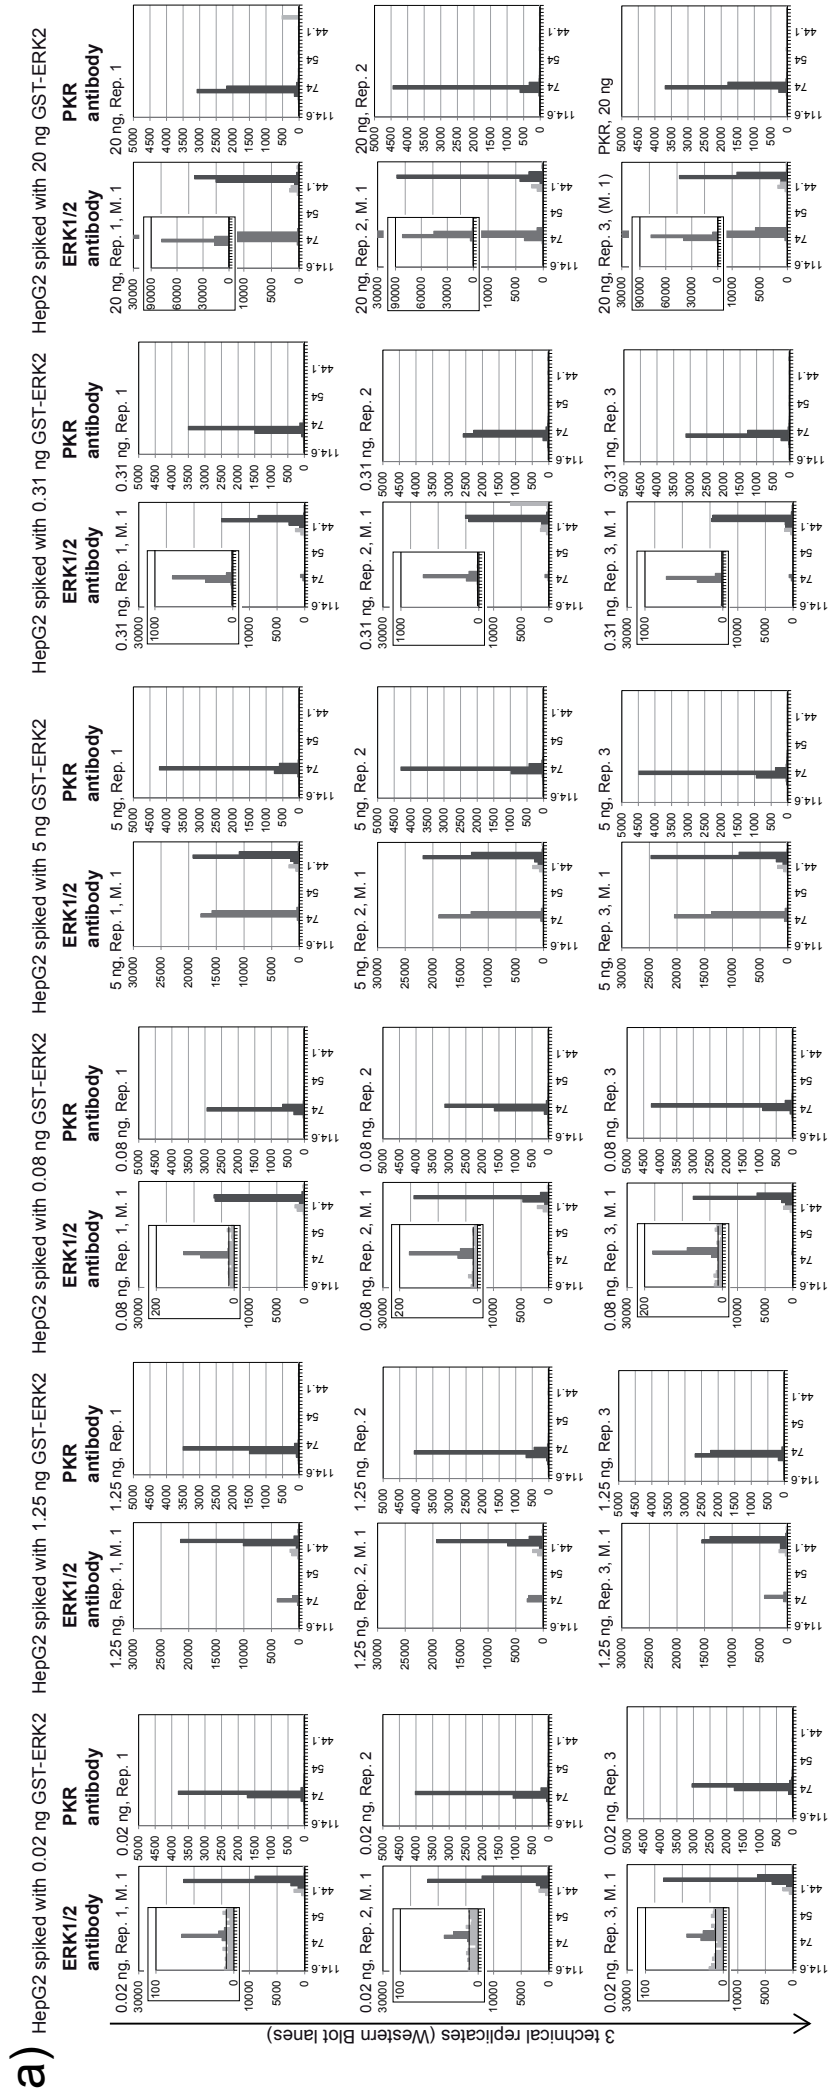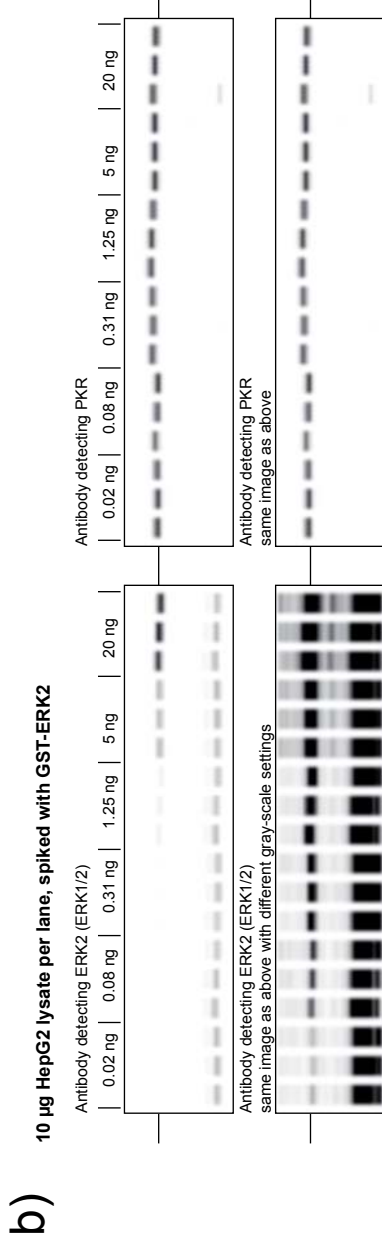

**Supplementary figure 6: Spike-in experiment to determine sensitivity, linearity and reproducibility of DigiWest.**

HepG2 lysate (10 µg per lane) was spiked with different amounts of GST-ERK2 (20 pg, 78 pg, 312 pg, 1.25 ng, 5 ng, 20 ng) and triplicate samples were generated. The 18 spiked samples were separated on three SDS-PAGE gels and DigiWest was performed for proteins with an apparent molecular weight between 40 kDa and 110 kDa. Bead-pools sufficient for 100 antibody incubations were prepared and aliquots were used for signal generation using an ERK1/2 specific antibody; measurements were repeated four times. The diagrams show intrinsic ERK2 highlighted in dark grey, GST-ERK2 in medium grey and ERK1 and remaining signal in light grey. Repeat measurements are shown from left to right whereas the technical replicates are shown from top to bottom.

The accompanying table shows the integrals of the identified peaks (GST-ERK2, intrinsic ERK2) obtained from DigiWest; the lower part of the table shows signal intensity obtained from quantification of the classical Western-Blot image.

Supplementary figure 6

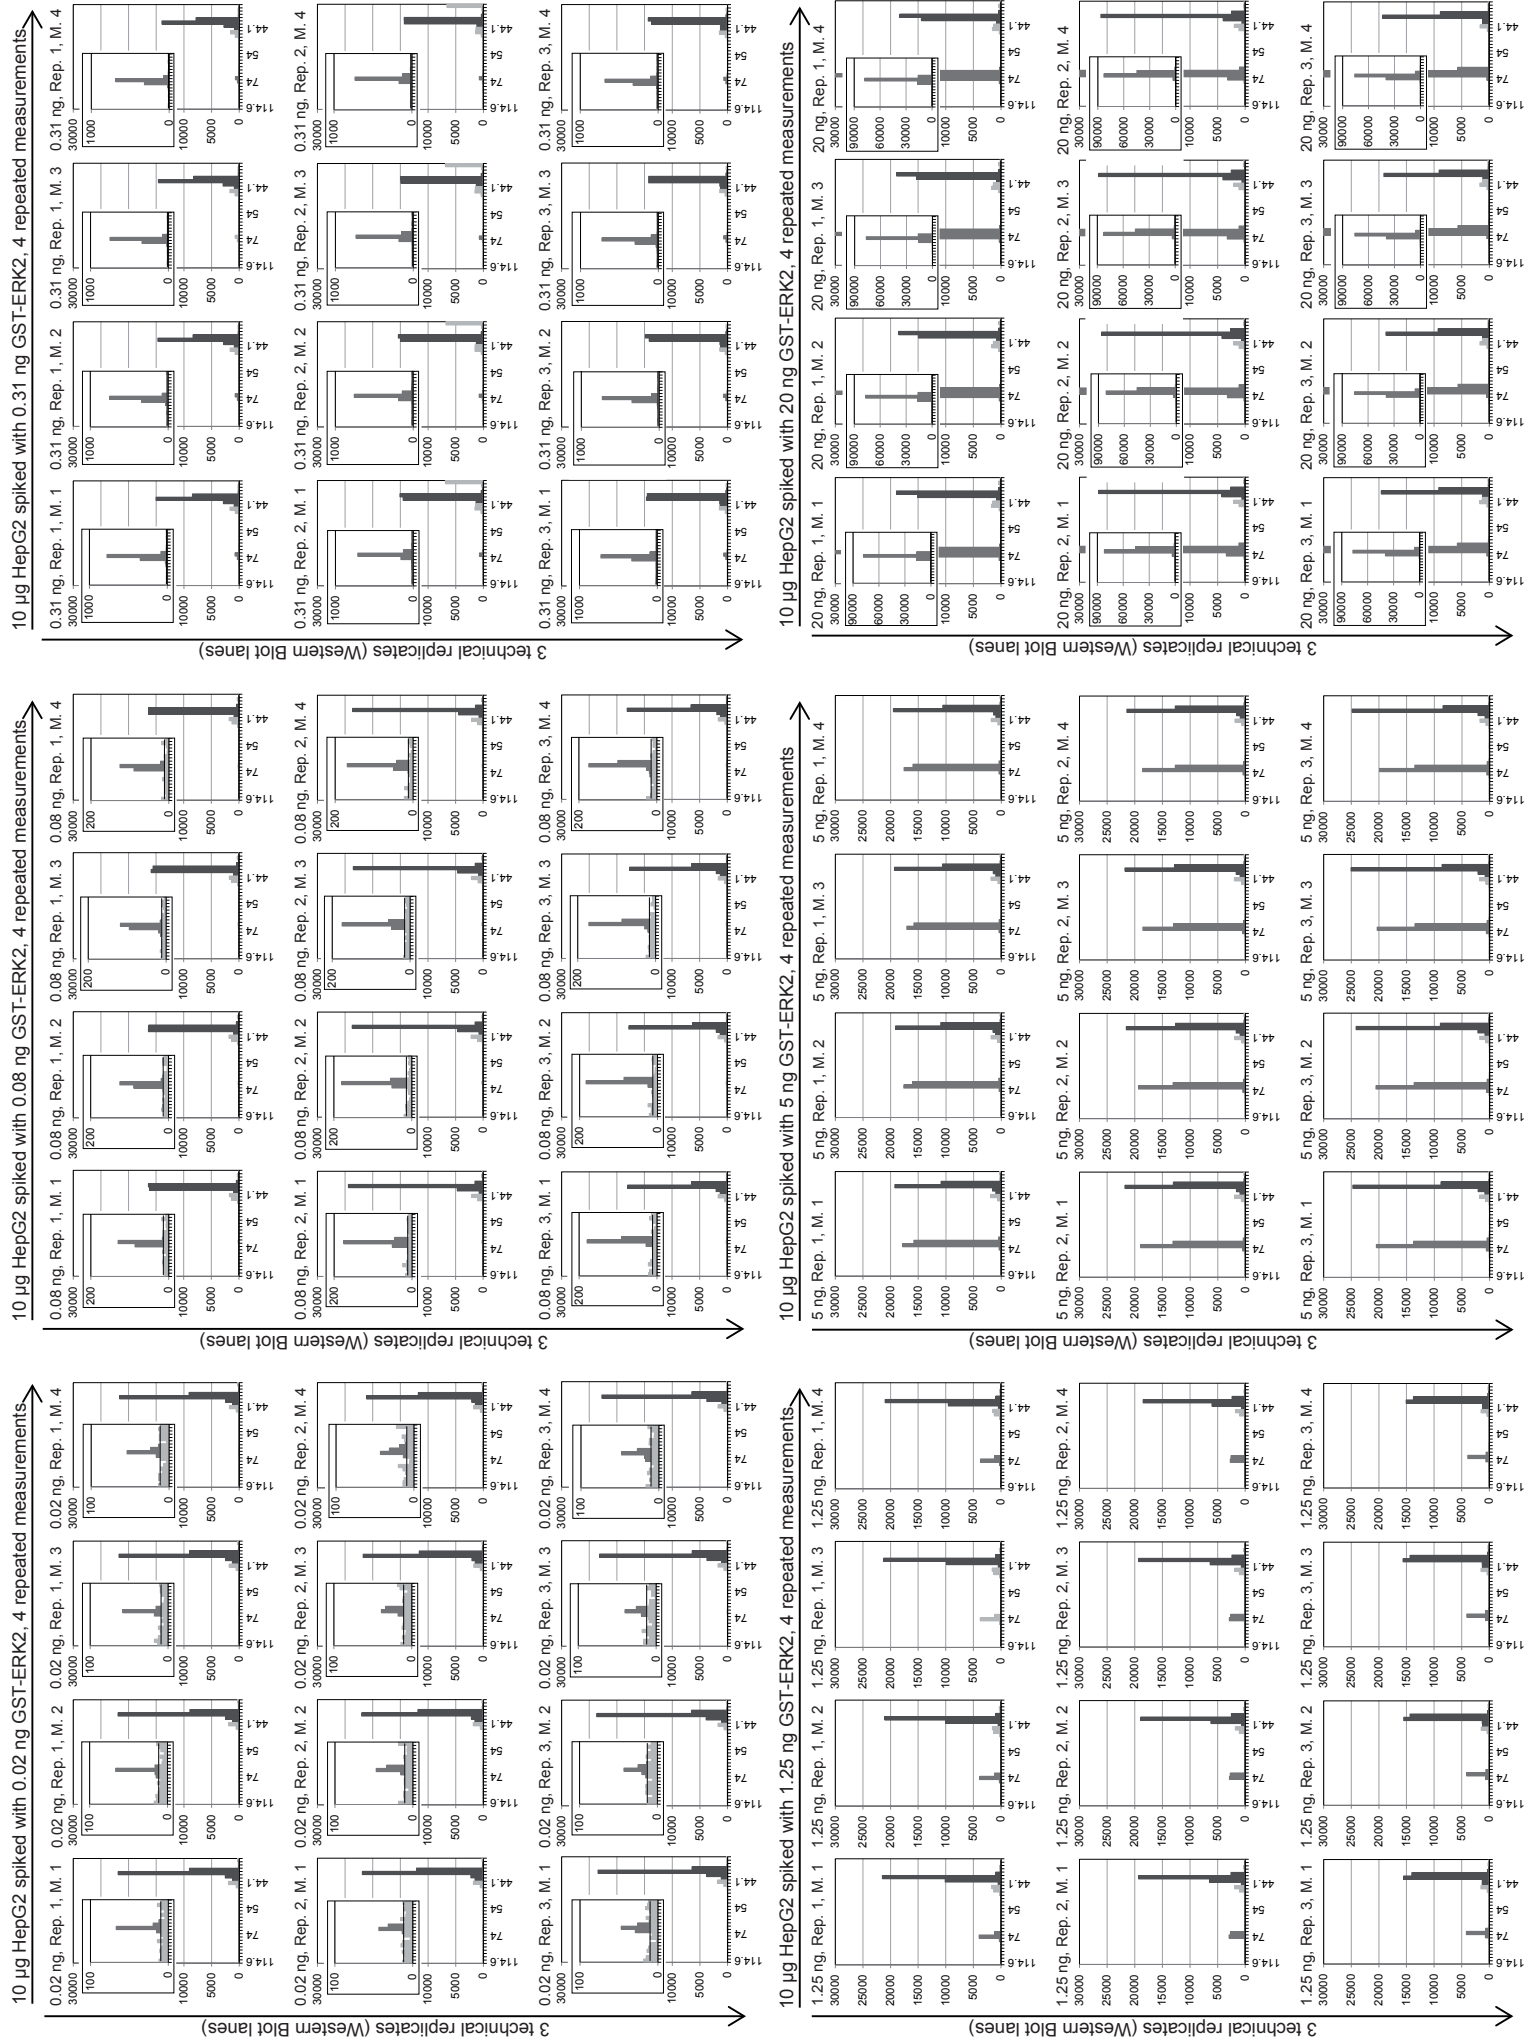

## DigiWest

### GST-ERK2 quantification

(Spike-in per 10 µg HepG2 Lysate, relative signal)

|                 | Replicate 1 | Replicate 2 | Replicate 3 |
|-----------------|-------------|-------------|-------------|
| 20 ng Meas. 1   | 111610      | 132187      | 123061      |
| Meas. 2         | 110545      | 131069      | 121013      |
| Meas. 3         | 109539      | 133063      | 121319      |
| Meas. 4         | 110796      | 132258      | 122093      |
| 5 ng Meas. 1    | 34446       | 32902       | 35241       |
| Meas. 2         | 34452       | 33242       | 35176       |
| Meas. 3         | 33635       | 32368       | 34849       |
| Meas. 4         | 34339       | 32063       | 34365       |
| 1.25 ng Meas. 1 | 5458        | 5860        | 5568        |
| Meas. 2         | 5339        | 5771        | 5471        |
| Meas. 3         | 5212        | 5727        | 5450        |
| Meas. 4         | 5095        | 5503        | 5178        |
| 0.31 ng Meas. 1 | 1208        | 993         | 1118        |
| Meas. 2         | 1159        | 1051        | 1159        |
| Meas. 3         | 1149        | 1046        | 1117        |
| Meas. 4         | 1074        | 1006        | 1086        |
| 0.08 ng Meas. 1 | 217         | 241         | 270         |
| Meas. 2         | 215         | 275         | 260         |
| Meas. 3         | 228         | 252         | 264         |
| Meas. 4         | 215         | 251         | 302         |
| 0.02 ng Meas. 1 | 85          | 60          | 73          |
| Meas. 2         | 78          | 75          | 77          |
| Meas. 3         | 67          | 64          | 74          |
| Meas. 4         | 73          | 71          | 79          |

| Mean   | CV (%) |
|--------|--------|
| 121546 | 7.58   |
| 33923  | 3.15   |
| 5469   | 4.37   |
| 1097   | 6.02   |
| 249    | 10.91  |
| 73     | 9.38   |

| Mean  | CV (%) |
|-------|--------|
| 32399 | 9.57   |

### Intrinsic ERK2

(in 10 µg HepG2 lysate, relative signal)

|                 | Replicate 1 | Replicate 2 | Replicate 3 |
|-----------------|-------------|-------------|-------------|
| 20 ng Meas. 1   | 34953       | 33795       | 29330       |
| Meas. 2         | 34518       | 33194       | 28654       |
| Meas. 3         | 35208       | 33441       | 28729       |
| Meas. 4         | 33745       | 33003       | 30158       |
| 5 ng Meas. 1    | 32769       | 37621       | 35915       |
| Meas. 2         | 32763       | 36971       | 35567       |
| Meas. 3         | 32522       | 37395       | 36033       |
| Meas. 4         | 32608       | 36794       | 35699       |
| 1.25 ng Meas. 1 | 33006       | 29025       | 32337       |
| Meas. 2         | 32512       | 28286       | 32558       |
| Meas. 3         | 32573       | 28731       | 32674       |
| Meas. 4         | 31866       | 27581       | 31418       |
| 0.31 ng Meas. 1 | 27349       | 31321       | 32156       |
| Meas. 2         | 26813       | 32022       | 31902       |
| Meas. 3         | 26737       | 31581       | 31398       |
| Meas. 4         | 25480       | 30164       | 30841       |
| 0.08 ng Meas. 1 | 33943       | 31263       | 27490       |
| Meas. 2         | 34069       | 30510       | 27039       |
| Meas. 3         | 32726       | 30317       | 27053       |
| Meas. 4         | 33933       | 30173       | 27490       |
| 0.02 ng Meas. 1 | 34688       | 37989       | 34494       |
| Meas. 2         | 34682       | 37824       | 34829       |
| Meas. 3         | 34465       | 37132       | 34060       |
| Meas. 4         | 34419       | 36704       | 33692       |

### GST-ERK2 quantification

(Spike-in per 10 µg HepG2 Lysate, relative signal)

|         | Replicate 1 | Replicate 2 | Replicate 3 |
|---------|-------------|-------------|-------------|
| 20 ng   | 318473100   | 329781002   |             |
| 5 ng    | 135073639   | 134463994   |             |
| 1.25 ng | 36316470    | 36196382    |             |
| 0.31 ng | 8911814     | 9002800     | 9625102     |
| 0.08 ng | 2586263     | 2532097     | 2636531     |
| 0.02 ng | 1108895     | 1177614     | 924245      |

| Mean      | CV%   |
|-----------|-------|
| 324127051 | NA    |
| 134768817 | NA    |
| 36256426  | NA    |
| 9179905   | 4.23  |
| 2584964   | 2.02  |
| 1070252   | 12.24 |

### Intrinsic ERK2 (in 10 µg HepG2 lysate)

(in 10 µg HepG2 lysate, relative signal)

|         | Replicate 1 | Replicate 2 | Replicate 3 |
|---------|-------------|-------------|-------------|
| 20 ng   | 106277100   | 107386932   |             |
| 5 ng    | 108356255   | 109254315   |             |
| 1.25 ng | 108724000   | 109124584   |             |
| 0.31 ng | 115500031   | 121316792   | 124221951   |
| 0.08 ng | 125092496   | 122582478   | 119270453   |
| 0.02 ng | 123804788   | 126355252   | 123822790   |

| Mean      | CV%  |
|-----------|------|
| 116739348 | 6.58 |

## Western-Blot on Licor Odyssey

**Supplementary figure 7: Generation of Lapatinib resistant H292 cells, IC50.**

To evoke resistance, H292 cells were cultured in the presence of increasing concentrations of Lapatinib for approximately 7 months. A cell viability assay shows that H292 parental cells are responsive to Lapatinib in the low nanomolar range (IC<sub>50</sub> ~ 10nM), whereas resistant cells tolerate 80 fold higher doses (IC<sub>50</sub> ~ 800nM).

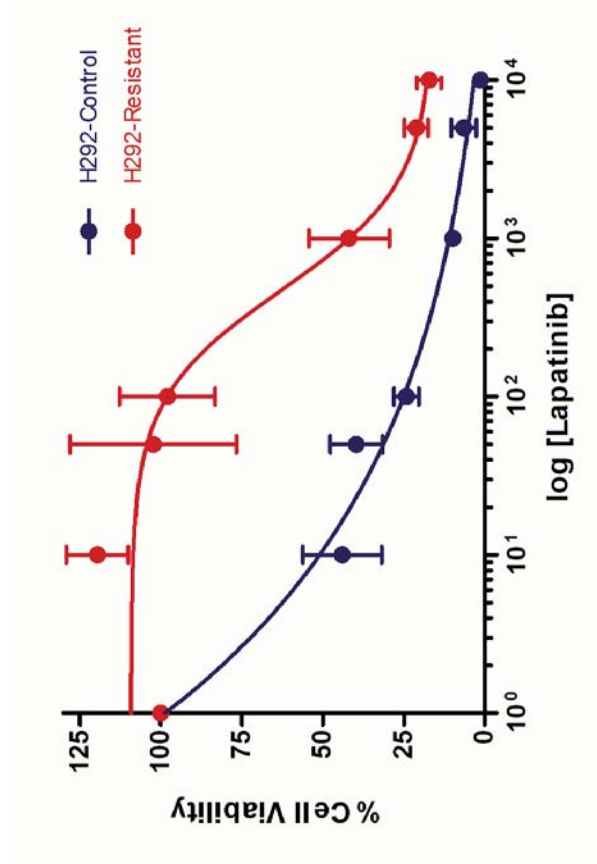

IC<sub>50</sub> Control ca. 10nM

IC<sub>50</sub> Resistant ca. 800nM

### Supplementary figure 8: H292 Lapatinib resistance: Western-Blot mimics of significant kinases.

Western-blot mimics generated from the data obtained on the Kinobead pulldowns from the Lapatinib resistant and the parental H292 cell lysates. Represented are all kinases which are shown in figure 4b and 4c which showed significant changes ( $p < 0.01$ ,  $\log_2 > 1$ ).

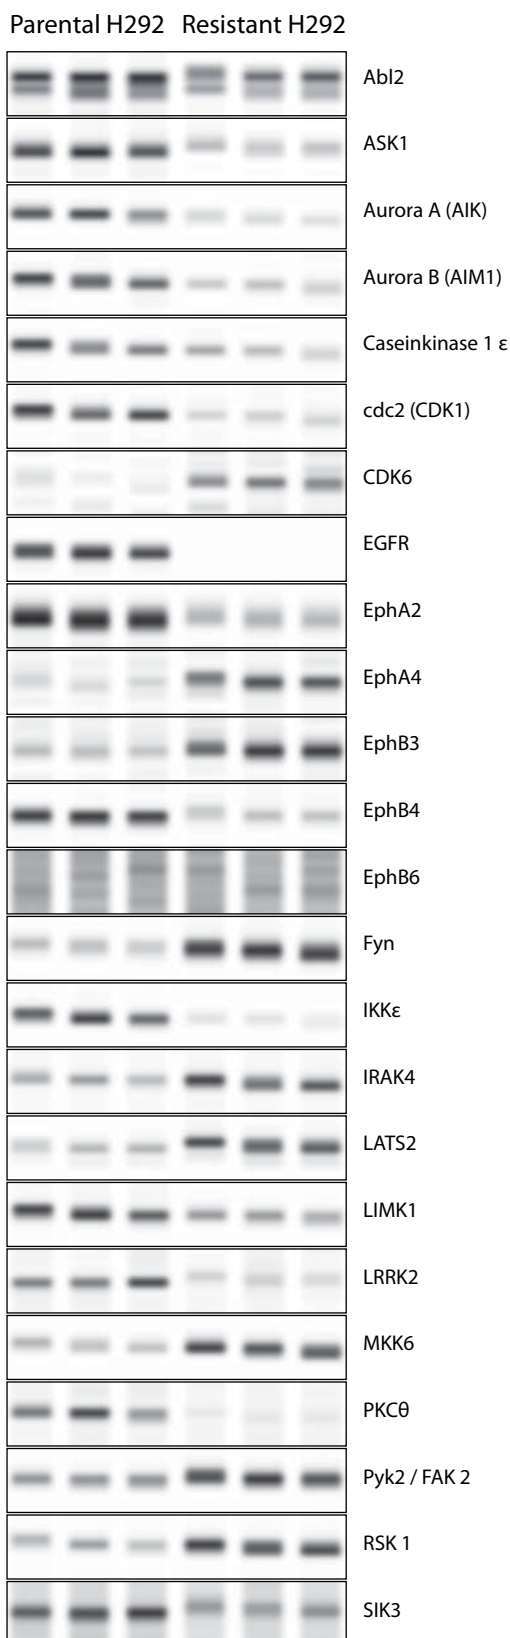

## Supplementary figure 9: H292 Lapatinib resistance: Canonical pathway and regulator analysis.

Shown are additional details from the Ingenuity pathway analysis for changes in the Lapatinib resistant H292 cell line compared to the parental cell line. Details on the analysis are provided in the methods section. Top canonical pathways associated with the uploaded dataset were extracted. Next, an upstream regulator analysis was performed in order to identify the cascade of upstream transcriptional regulators that are able to explain the observed gene expression changes in our dataset. Given are the top 5 canonical pathways and the top 5 regulators from the analysis.

## Regulator Analysis

| Top Canonical Pathways                            |          |              |
|---------------------------------------------------|----------|--------------|
| Name                                              | p-value  | Overlap      |
| HER-2 Signaling in Breast Cancer                  | 1.48E-12 | 10.5 % 8/76  |
| Apoptosis Signaling                               | 4.96E-12 | 9.1 % 8/88   |
| Molecular Mechanisms of Cancer                    | 4.69E-11 | 3.1 % 11/359 |
| Cell Cycle: G2/M DNA Damage Checkpoint Regulation | 4.49E-10 | 12.2 % 6/49  |
| Cyclins and Cell Cycle Regulation                 | 7.33E-09 | 7.8 % 6/77   |

| Top Upstream Regulators |                    |
|-------------------------|--------------------|
| Upstream Regulator      | p-value of overlap |
| TP53                    | 2.05E-15           |
| FOXM1                   | 6.89E-11           |
| NOTCH1                  | 3.55E-07           |
| BRCA1                   | 1.87E-06           |
| TOP3A                   | 2.99E-06           |
